# Supplementary material for: lncRNA HOXC-AS2 promotes the progression of hypopharyngeal cancer by binding to the P62 protein mediating the autophagy process
Source: publisher site journal article supplement (doi:10.18632/aging.205192), 2023-11-08
Supplement: Supplementary file [file aging-v15i21-205192-supplementary-material-SD1.pdf]

## SUPPLEMENTARY FIGURE

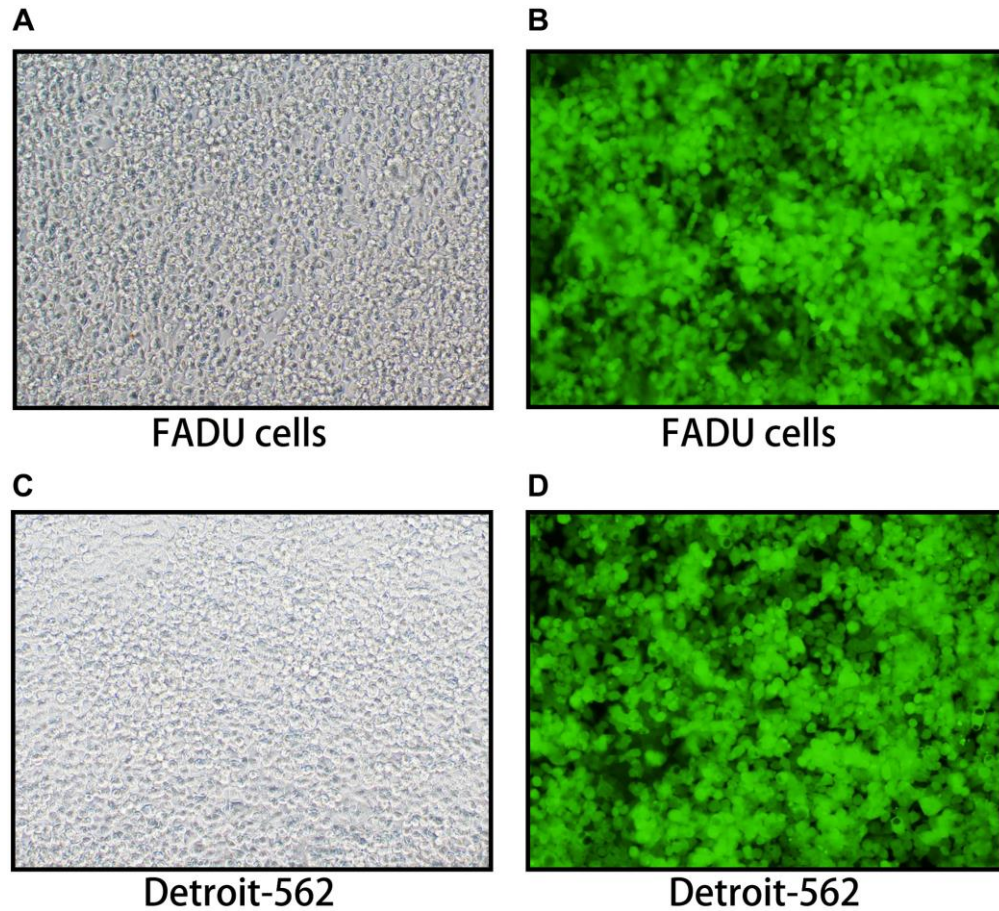

**Supplementary Figure 1. The transfection efficiency of cells transfected with Lentivirus under fluorescence microscope.** (A) Clear field of FADU cells not infected with HOXC-AS2 overexpressing lentivirus, magnification 200 $\times$ . (B) Green fluorescence field after infection of FADU cells by lentivirus overexpressing HOXC-AS2. Lentivirus infection rate exceeds 85%, magnification 200 $\times$ . (C) Clear field of Detroit-562 cells uninfected with HOXC-AS2 knockdown lentivirus, magnification 200 $\times$ . (D) Green fluorescence field after infection of Detroit-562 cells with lentivirus knockdown HOXC-AS2, lentivirus infection rate was over 85%, magnification 200 $\times$ .
