# Supplementary material for: lncRNA HOXC-AS2 promotes the progression of hypopharyngeal cancer by binding to the P62 protein mediating the autophagy process
Source: publisher site journal article supplement (doi:10.18632/aging.205192), 2023-11-08
Supplement: Supplementary file [file aging-v15i21-205192-supplementary-material-SD2.pdf]

## SUPPLEMENTARY TABLE

Supplementary Table 1. Clinicopathologic characteristics of 3 patients with lncRNA sequencing.

| Number | Gender | Age (years) | T stage | LM | DM | Tumor size (cm) | Smoking history | Drinking history | Family history | Pathological pattern                                                                         |
|--------|--------|-------------|---------|----|----|-----------------|-----------------|------------------|----------------|----------------------------------------------------------------------------------------------|
| 1      | Male   | 69          | T4      | N3 | No | 5.9 × 4.7 × 4.3 | Yes             | Yes              | No             | Poor differentiation squamous cell carcinoma, individual vascular invasion                   |
| 2      | Male   | 57          | T3      | N2 | No | 4.5 × 4.0 × 3.8 | Yes             | Yes              | No             | Well differentiated squamous cell carcinoma                                                  |
| 3      | Male   | 57          | T3      | N1 | No | 3.7 × 3.2 × 3.0 | Yes             | Yes              | No             | Moderately differentiated squamous cell carcinoma, Invasion of the surrounding muscle tissue |
