# Supplementary material for: lncRNA HOXC-AS2 promotes the progression of hypopharyngeal cancer by binding to the P62 protein mediating the autophagy process
Source: Aging (Albany NY). 2023 Nov 8;15(21):12476–96. doi: 10.18632/aging.205192 (PMC10683610; doi:10.18632/aging.205192)
Supplement: Supplementary Table 2 [file aging-15-205192-s003.xls]

## Sheet: Sheet1
Supplementary Table 2. Primers and related sequences involved in this subject.
Gene	sequence
lncRNAHOXC-AS2-Primer	F:5'-AACTGCATGTGGCCTGTAGC-3′.
	R:5'-GCAGGCCTTAGCTGGATTTG-3′.
lncRNAHOXC-AS2 FISH probe (5’-3’)
LV-Oe-HOXC-AS2(79537-1)	GTTAGACGAAGCTTGGGCTGCAGGTCGACTCTAGAGGATCCAGGTTCCGCAGGTCCACAACTGCATGTGGCCTGTAGCCCCCATTCTCCACATTTGGAGGGGTGTGGGTGGCAGACCAGGGCTTTGAAGCGGACCTGCAGATTTCCCTCAAATCCAGCTAAGGCCTGCGCTGGAAGCAGAAACTGAGTTCTCTTGGCCTGCCGCGAGGAAACCCGCGTCCTGCCCCCACCCAAGGAAATTTGCAGTGACTTTGGAGCCCAGACTGAGGAAGCGGAGGTGGCGAAAGGAGAGACAATACGAGCCCGAAGTACAATTAAGGGGCCAGAGCCGCTCGTCTCTCCCCCGCCCTCCCTGCCCGACTGCGAGCTGTCTGGCCTCAAACCTCAGGGCGACACGCGA…
lncRNAHOXC-AS2 RNA protein pull-down probe
NO.	5’	STEM	Loop	STEM	3’
LV-SH-HOXC-AS2-RNAi(110763-1)-a	Ccgg	GCAGAAACTGAGTTCTCTTGG	CTCGAG	CCAAGAGAACTCAGTTTCTGC	TTTTTg
LV-SH-HOXC-AS2-RNAi(110763-1)-b	aattcaaaaa	GCAGAAACTGAGTTCTCTTGG	CTCGAG	CCAAGAGAACTCAGTTTCTGC
LV-SH-HOXC-AS2-RNAi(110764-11)-a	Ccgg	GCGAAAGGAGAGACAATACGA	CTCGAG	TCGTATTGTCTCTCCTTTCGC	TTTTTg
LV-SH-HOXC-AS2-RNAi(110764-11)-b	aattcaaaaa	GCGAAAGGAGAGACAATACGA	CTCGAG	TCGTATTGTCTCTCCTTTCGC
LV-SH-HOXC-AS2-RNAi(110765-11)-a	Ccgg	GGACCTGCAGATTTCCCTCAA	CTCGAG	TTGAGGGAAATCTGCAGGTCC	TTTTTg
LV-SH-HOXC-AS2-RNAi(110765-11)-b	aattcaaaaa	GGACCTGCAGATTTCCCTCAA	CTCGAG	TTGAGGGAAATCTGCAGGTCC
SH-SQSTM1(40192-1)	CCGAATCTACATTAAAGAGAA
SH-SQSTM1(40193-2)	CGAGGAATTGACAATGGCCAT
SH-SQSTM1(40194-3)	GAGGATCCGAGTGTGAATTTC
β-actin	F:5'-GACCACCTTCAACTCCATCAT-3'.
	R:5'-CCTGCTTGCTAATCCACATCT-3′.
U6	F:5’-CTCGCTTCGGCAGCACA-3’
	R:5’-CTCAACTGGTGTCGTGGA-3’
GAPDH:	F:5’-GGAAGCTTGTCATCAATGGAAATC-3’.
	R:5’-TGATGACCCTTTTGGCTCCC-3’.
HOXC-AS2 T1	F：TAATACGACTCACTATAGGGAGGTTCCGCAGGTCCAC
HOXC-AS2 T1	R:ACCTCCGCTTCCTCAGTC
HOXC-AS2 T2	F：TAATACGACTCACTATAGGGGACTGAGGAAGCGGAGGT
HOXC-AS2 T2	R：GAATTTGCACTTTCATTCAT
SQSTM1(P62)	F：5'-CTAGGCATCGAGGTTGACATT-3'
	R：5'-CTTGGCTGAGTACCACTCTTATC-3'
HMOX1	F:5'-GGAACTGAGGATGCTGAAGG-3'
	R:5'-AAGGAGGAAGGAGCCTATGG-3'
