# Supplementary material for: lncRNA HOXC-AS2 promotes the progression of hypopharyngeal cancer by binding to the P62 protein mediating the autophagy process
Source: Aging (Albany NY). 2023 Nov 8;15(21):12476–96. doi: 10.18632/aging.205192 (PMC10683610; doi:10.18632/aging.205192)
Supplement: Supplementary Table 3 [file aging-15-205192-s004.xlsx]

## Sheet: Sheet1
Supplementary Table 3. After lncRNA-HOXC-AS2 overexpression, different proteins were obtained from RNA-pulldown. NC group was used as control.
RNA pull down (differentially expressed protein)	gene		TOP 20
sp|P62736|ACTA_HUMAN	ACTA2		DDX17
sp|Q99880|H2B1L_HUMAN	H2B1L		RBMX
sp|P16403|H12_HUMAN	H12		ANXA2
sp|P16402|H13_HUMAN	H13		TMPO
sp|Q92841|DDX17_HUMAN	DDX17	DDX17	SQSTM1
sp|P12814|ACTN1_HUMAN	ACTN1		FBRL
sp|Q5TEC6|H3PS2_HUMAN	H3PS2		HNRNPL
sp|Q93077|H2A1C_HUMAN	H2A1C		NUP93
sp|P38159|RBMX_HUMAN	RBMX	RBMX	LMNB2
sp|P07355|ANXA2_HUMAN	ANXA2	ANXA2	ADAR1
sp|P42167|LAP2B_HUMAN	LAP2B	TMPO	TAF15
sp|O76021|RL1D1_HUMAN	RL1D1		HADHA
sp|P07437|TBB5_HUMAN	TBB5		HSPA1A
sp|Q13501|SQSTM_HUMAN	SQSTM	SQSTM1	DDX54
sp|P68371|TBB4B_HUMAN	TBB4B		FUS
sp|P39023|RL3_HUMAN	RL3		WDR46
sp|P22087|FBRL_HUMAN	FBRL	FBRL	CTNNA1
sp|P68363|TBA1B_HUMAN	TBA1B		NOL6
sp|P14866|HNRPL_HUMAN	HNRPL	HNRNPL	HSPA5
sp|Q8N1F7|NUP93_HUMAN	NUP93	NUP93	DDX18
sp|Q03252|LMNB2_HUMAN	LMNB2	LMNB2
sp|Q8IUE6|H2A2B_HUMAN	H2A2B
sp|P55265|DSRAD_HUMAN	DSRAD	ADAR1
sp|Q05682|CALD1_HUMAN	CALD1
sp|Q92804|RBP56_HUMAN	RBP56	TAF15
sp|P40939|ECHA_HUMAN	ECHA	HADHA
sp|P0DMV8|HS71A_HUMAN	HS71A	HSPA1A
sp|Q8TDD1|DDX54_HUMAN	DDX54	DDX54
sp|P35637|FUS_HUMAN	FUS	FUS
sp|O15213|WDR46_HUMAN	WDR46	WDR46
sp|P35221|CTNA1_HUMAN	CTNA1	CTNNA1
sp|Q9H6R4|NOL6_HUMAN	NOL6	NOL6
sp|P11021|BIP_HUMAN	BIP	HSPA5
sp|Q9NVP1|DDX18_HUMAN	DDX18	DDX18
sp|P11940|PABP1_HUMAN	PABP1
sp|O94906|PRP6_HUMAN	PRP6
sp|Q99729|ROAA_HUMAN	ROAA
sp|Q8WTT2|NOC3L_HUMAN	NOC3L
sp|Q99459|CDC5L_HUMAN	CDC5L
sp|Q9NXF1|TEX10_HUMAN	TEX10
sp|Q15050|RRS1_HUMAN	RRS1
sp|Q9P0M6|H2AW_HUMAN	H2AW
sp|Q13151|ROA0_HUMAN	ROA0
sp|P68366|TBA4A_HUMAN	TBA4A
sp|Q9BYG3|MK67I_HUMAN	MK67I
sp|P16401|H15_HUMAN	H15
sp|P38919|IF4A3_HUMAN	IF4A3
sp|P07199|CENPB_HUMAN	CENPB
sp|Q01130|SRSF2_HUMAN	SRSF2
sp|Q9UMS4|PRP19_HUMAN	PRP19
sp|P40429|RL13A_HUMAN	RL13A
sp|P05198|IF2A_HUMAN	IF2A
sp|Q969X6|UTP4_HUMAN	UTP4
sp|Q8TED0|UTP15_HUMAN	UTP15
sp|P41091|IF2G_HUMAN	IF2G
sp|Q9Y265|RUVB1_HUMAN	RUVB1
sp|P05141|ADT2_HUMAN	ADT2
sp|P35241|RADI_HUMAN	RADI
sp|Q9NY93|DDX56_HUMAN	DDX56
sp|Q15061|WDR43_HUMAN	WDR43
sp|Q9H0D6|XRN2_HUMAN	XRN2
sp|Q6WCQ1|MPRIP_HUMAN	MPRIP
sp|O60832|DKC1_HUMAN	DKC1
sp|Q9Y5J1|UTP18_HUMAN	UTP18
sp|Q9Y333|LSM2_HUMAN	LSM2
sp|Q13330|MTA1_HUMAN	MTA1
sp|P57740|NU107_HUMAN	NU107
sp|Q13823|NOG2_HUMAN	NOG2
sp|P56182|RRP1_HUMAN	RRP1
sp|Q6RFH5|WDR74_HUMAN	WDR74
sp|Q9BQG0|MBB1A_HUMAN	MBB1A
sp|Q9BVJ6|UT14A_HUMAN	UT14A
sp|P34897|GLYM_HUMAN	GLYM
sp|Q9BUQ8|DDX23_HUMAN	DDX23
sp|O43663|PRC1_HUMAN	PRC1
sp|O75083|WDR1_HUMAN	WDR1
sp|P26368|U2AF2_HUMAN	U2AF2
sp|O43818|U3IP2_HUMAN	U3IP2
sp|P62316|SMD2_HUMAN	SMD2
sp|P37108|SRP14_HUMAN	SRP14
sp|Q9Y230|RUVB2_HUMAN	RUVB2
sp|Q9GZR7|DDX24_HUMAN	DDX24
sp|O60216|RAD21_HUMAN	RAD21
sp|Q96FV9|THOC1_HUMAN	THOC1
sp|Q15269|PWP2_HUMAN	PWP2
sp|Q01780|EXOSX_HUMAN	EXOSX
sp|P35659|DEK_HUMAN	DEK
sp|Q02241|KIF23_HUMAN	KIF23
sp|Q9H0H5|RGAP1_HUMAN	RGAP1
sp|P53396|ACLY_HUMAN	ACLY
sp|P14618|KPYM_HUMAN	KPYM
sp|Q53GS9|SNUT2_HUMAN	SNUT2
sp|P17480|UBF1_HUMAN	UBF1
sp|Q9HCS7|SYF1_HUMAN	SYF1
sp|Q8N684|CPSF7_HUMAN	CPSF7
sp|Q15019|SEPT2_HUMAN	SEPT2
sp|Q8NI36|WDR36_HUMAN	WDR36
sp|O60264|SMCA5_HUMAN	SMCA5
sp|Q13085|ACACA_HUMAN	ACACA
sp|P46060|RAGP1_HUMAN	RAGP1
sp|O15381|NVL_HUMAN	NVL
sp|Q13283|G3BP1_HUMAN	G3BP1
sp|Q9BQ39|DDX50_HUMAN	DDX50
sp|P62847|RS24_HUMAN	RS24
sp|P38432|COIL_HUMAN	COIL
sp|Q04837|SSBP_HUMAN	SSBP
sp|P05388|RLA0_HUMAN	RLA0
sp|Q7Z7K6|CENPV_HUMAN	CENPV
sp|Q9UHD8|SEPT9_HUMAN	SEPT9
sp|P46782|RS5_HUMAN	RS5
sp|O14979|HNRDL_HUMAN	HNRDL
sp|Q8N3V7|SYNPO_HUMAN	SYNPO
sp|O00505|IMA4_HUMAN	IMA4
sp|O43670|ZN207_HUMAN	ZN207
sp|Q9GZL7|WDR12_HUMAN	WDR12
sp|P13797|PLST_HUMAN	PLST
sp|P16070|CD44_HUMAN	CD44
sp|Q9H9Y2|RPF1_HUMAN	RPF1
sp|P15311|EZRI_HUMAN	EZRI
sp|P19525|E2AK2_HUMAN	E2AK2
sp|Q15397|PUM3_HUMAN	PUM3
sp|O43172|PRP4_HUMAN	PRP4
sp|Q96T88|UHRF1_HUMAN	UHRF1
sp|Q9NV06|DCA13_HUMAN	DCA13
sp|P55209|NP1L1_HUMAN	NP1L1
sp|Q9UHX1|PUF60_HUMAN	PUF60
sp|P26196|DDX6_HUMAN	DDX6
sp|Q07666|KHDR1_HUMAN	KHDR1
sp|Q13148|TADBP_HUMAN	TADBP
sp|Q13247|SRSF6_HUMAN	SRSF6
sp|Q8NFJ5|RAI3_HUMAN	RAI3
sp|O43684|BUB3_HUMAN	BUB3
sp|Q9Y3T9|NOC2L_HUMAN	NOC2L
sp|Q9NY61|AATF_HUMAN	AATF
sp|Q13415|ORC1_HUMAN	ORC1
sp|Q12874|SF3A3_HUMAN	SF3A3
sp|P83111|LACTB_HUMAN	LACTB
sp|Q9UKV3|ACINU_HUMAN	ACINU
sp|P84103|SRSF3_HUMAN	SRSF3
sp|Q9Y2W1|TR150_HUMAN	TR150
sp|P62304|RUXE_HUMAN	RUXE
sp|P06744|G6PI_HUMAN	G6PI
sp|P14678|RSMB_HUMAN	RSMB
sp|Q13492|PICAL_HUMAN	PICAL
sp|Q8NCA5|FA98A_HUMAN	FA98A
sp|Q16630|CPSF6_HUMAN	CPSF6
sp|Q9H334|FOXP1_HUMAN	FOXP1
sp|Q9NX24|NHP2_HUMAN	NHP2
sp|Q9P0V9|SEP10_HUMAN	SEP10
sp|P52948|NUP98_HUMAN	NUP98
sp|Q12797|ASPH_HUMAN	ASPH
sp|P11413|G6PD_HUMAN	G6PD
sp|P35268|RL22_HUMAN	RL22
sp|Q8N556|AFAP1_HUMAN	AFAP1
sp|O75683|SURF6_HUMAN	SURF6
sp|Q9NQ55|SSF1_HUMAN	SSF1
sp|P27694|RFA1_HUMAN	RFA1
sp|P08579|RU2B_HUMAN	RU2B
sp|E9PAV3|NACAM_HUMAN	NACAM
sp|Q14974|IMB1_HUMAN	IMB1
sp|P42766|RL35_HUMAN	RL35
sp|Q9H8H2|DDX31_HUMAN	DDX31
sp|Q7KZF4|SND1_HUMAN	SND1
sp|Q9NYF8|BCLF1_HUMAN	BCLF1
sp|P61247|RS3A_HUMAN	RS3A
sp|P42224|STAT1_HUMAN	STAT1
sp|O60341|KDM1A_HUMAN	KDM1A
sp|Q9NRG9|AAAS_HUMAN	AAAS
sp|Q14684|RRP1B_HUMAN	RRP1B
sp|Q9BVI4|NOC4L_HUMAN	NOC4L
sp|Q71UM5|RS27L_HUMAN	RS27L
sp|Q2TAY7|SMU1_HUMAN	SMU1
sp|Q5T2N8|ATD3C_HUMAN	ATD3C
sp|Q8IWA0|WDR75_HUMAN	WDR75
sp|Q13868|EXOS2_HUMAN	EXOS2
sp|O43159|RRP8_HUMAN	RRP8
sp|P17096|HMGA1_HUMAN	HMGA1
sp|Q15427|SF3B4_HUMAN	SF3B4
sp|P55072|TERA_HUMAN	TERA
sp|O94776|MTA2_HUMAN	MTA2
sp|Q96C19|EFHD2_HUMAN	EFHD2
sp|Q99848|EBP2_HUMAN	EBP2
sp|P47914|RL29_HUMAN	RL29
sp|Q86V81|THOC4_HUMAN	THOC4
sp|P50402|EMD_HUMAN	EMD
sp|Q9BZF1|OSBL8_HUMAN	OSBL8
sp|Q9NUQ6|SPS2L_HUMAN	SPS2L
sp|P02042|HBD_HUMAN	HBD
sp|P04004|VTNC_HUMAN	VTNC
sp|O75475|PSIP1_HUMAN	PSIP1
sp|Q09161|NCBP1_HUMAN	NCBP1
sp|O95782|AP2A1_HUMAN	AP2A1
sp|P62244|RS15A_HUMAN	RS15A
sp|P49756|RBM25_HUMAN	RBM25
sp|Q5QJE6|TDIF2_HUMAN	TDIF2
sp|O00566|MPP10_HUMAN	MPP10
sp|Q9Y6V7|DDX49_HUMAN	DDX49
sp|P62136|PP1A_HUMAN	PP1A
sp|P62140|PP1B_HUMAN	PP1B
sp|P62280|RS11_HUMAN	RS11
sp|P49207|RL34_HUMAN	RL34
sp|Q06265|EXOS9_HUMAN	EXOS9
sp|Q9H0A0|NAT10_HUMAN	NAT10
sp|P13639|EF2_HUMAN	EF2
sp|Q07065|CKAP4_HUMAN	CKAP4
sp|P52907|CAZA1_HUMAN	CAZA1
sp|P78371|TCPB_HUMAN	TCPB
sp|Q9Y3Y2|CHTOP_HUMAN	CHTOP
sp|O60716|CTND1_HUMAN	CTND1
sp|P23528|COF1_HUMAN	COF1
sp|Q92979|NEP1_HUMAN	NEP1
sp|Q9H6F5|CCD86_HUMAN	CCD86
sp|P06748|NPM_HUMAN	NPM
sp|Q14978|NOLC1_HUMAN	NOLC1
sp|Q13547|HDAC1_HUMAN	HDAC1
sp|Q9UQE7|SMC3_HUMAN	SMC3
sp|O95153|RIMB1_HUMAN	RIMB1
sp|Q9P2I0|CPSF2_HUMAN	CPSF2
sp|Q6DKI1|RL7L_HUMAN	RL7L
sp|P56537|IF6_HUMAN	IF6
sp|Q9NVX2|NLE1_HUMAN	NLE1
sp|Q92817|EVPL_HUMAN	EVPL
sp|Q9Y3I0|RTCB_HUMAN	RTCB
sp|Q9NYH9|UTP6_HUMAN	UTP6
sp|P63010|AP2B1_HUMAN	AP2B1
sp|Q7Z3B4|NUP54_HUMAN	NUP54
sp|Q99623|PHB2_HUMAN	PHB2
sp|A7MCY6|TBKB1_HUMAN	TBKB1
sp|Q15582|BGH3_HUMAN	BGH3
sp|O75494|SRS10_HUMAN	SRS10
sp|P49959|MRE11_HUMAN	MRE11
sp|Q9BXY0|MAK16_HUMAN	MAK16
sp|O94901|SUN1_HUMAN	SUN1
sp|Q9UJT9|FBXL7_HUMAN	FBXL7
sp|Q9UBI6|GBG12_HUMAN	GBG12
sp|Q01844|EWS_HUMAN	EWS
sp|P46779|RL28_HUMAN	RL28
sp|Q14254|FLOT2_HUMAN	FLOT2
sp|O43290|SNUT1_HUMAN	SNUT1
sp|Q01813|PFKAP_HUMAN	PFKAP
sp|Q9UKD2|MRT4_HUMAN	MRT4
sp|Q2TB90|HKDC1_HUMAN	HKDC1
sp|O43660|PLRG1_HUMAN	PLRG1
sp|O60502|OGA_HUMAN	OGA
sp|O60303|KATIP_HUMAN	KATIP
sp|P67809|YBOX1_HUMAN	YBOX1
sp|Q13045|FLII_HUMAN	FLII
sp|Q9NQ29|LUC7L_HUMAN	LUC7L
sp|P06396|GELS_HUMAN	GELS
sp|O94973|AP2A2_HUMAN	AP2A2
sp|Q13601|KRR1_HUMAN	KRR1
sp|Q92499|DDX1_HUMAN	DDX1
sp|Q86TM6|SYVN1_HUMAN	SYVN1
sp|Q14241|ELOA1_HUMAN	ELOA1
sp|Q9BZJ0|CRNL1_HUMAN	CRNL1
sp|Q12996|CSTF3_HUMAN	CSTF3
sp|Q96A72|MGN2_HUMAN	MGN2
sp|P17987|TCPA_HUMAN	TCPA
sp|Q13435|SF3B2_HUMAN	SF3B2
sp|Q9BSC4|NOL10_HUMAN	NOL10
sp|O95453|PARN_HUMAN	PARN
sp|Q8NEJ9|NGDN_HUMAN	NGDN
sp|Q9Y2R4|DDX52_HUMAN	DDX52
sp|Q13825|AUHM_HUMAN	AUHM
sp|P46939|UTRO_HUMAN	UTRO
sp|Q92945|FUBP2_HUMAN	FUBP2
sp|Q9Y6N5|SQOR_HUMAN	SQOR
sp|Q9NRK6|ABCBA_HUMAN	ABCBA
sp|Q9P2D6|F135A_HUMAN	F135A
sp|Q8TDN6|BRX1_HUMAN	BRX1
sp|Q9Y2P8|RCL1_HUMAN	RCL1
sp|Q9NWT1|PK1IP_HUMAN	PK1IP
sp|Q05519|SRS11_HUMAN	SRS11
sp|Q9UBU9|NXF1_HUMAN	NXF1
sp|Q86YP4|P66A_HUMAN	P66A
sp|P39019|RS19_HUMAN	RS19
sp|Q15287|RNPS1_HUMAN	RNPS1
sp|O14974|MYPT1_HUMAN	MYPT1
sp|Q53F19|NCBP3_HUMAN	NCBP3
sp|P30260|CDC27_HUMAN	CDC27
sp|Q9BV38|WDR18_HUMAN	WDR18
sp|Q96KR1|ZFR_HUMAN	ZFR
sp|Q96C45|ULK4_HUMAN	ULK4
sp|Q56P03|EAPP_HUMAN	EAPP
sp|Q5VT25|MRCKA_HUMAN	MRCKA
sp|Q96T37|RBM15_HUMAN	RBM15
sp|P11586|C1TC_HUMAN	C1TC
sp|Q9NQS7|INCE_HUMAN	INCE
sp|O75152|ZC11A_HUMAN	ZC11A
sp|O43809|CPSF5_HUMAN	CPSF5
sp|P62314|SMD1_HUMAN	SMD1
sp|Q9UFC0|LRWD1_HUMAN	LRWD1
sp|Q96EY1|DNJA3_HUMAN	DNJA3
sp|O75900|MMP23_HUMAN	MMP23
sp|Q15637|SF01_HUMAN	SF01
sp|Q6UB28|MAP12_HUMAN	MAP12
sp|A0A494C0N9|F246B_HUMAN	0N9|F246B
sp|Q86Y07|VRK2_HUMAN	VRK2
sp|P18621|RL17_HUMAN	RL17
sp|Q13202|DUS8_HUMAN	DUS8
sp|O95232|LC7L3_HUMAN	LC7L3
sp|Q8N7U6|EFHB_HUMAN	EFHB
sp|O75923|DYSF_HUMAN	DYSF
sp|Q8TEQ8|PIGO_HUMAN	PIGO
sp|Q92616|GCN1_HUMAN	GCN1
sp|Q96MF0|YO028_HUMAN	YO028
sp|P07737|PROF1_HUMAN	PROF1
sp|Q9NR56|MBNL1_HUMAN	MBNL1
sp|Q68DL7|CR063_HUMAN	CR063
sp|P46013|KI67_HUMAN	KI67
sp|P62318|SMD3_HUMAN	SMD3
sp|Q9NS98|SEM3G_HUMAN	SEM3G
sp|Q9ULJ8|NEB1_HUMAN	NEB1
sp|Q9P258|RCC2_HUMAN	RCC2
sp|Q504T8|MIDN_HUMAN	MIDN
sp|Q9NRH3|TBG2_HUMAN	TBG2
sp|Q7L2R6|ZN765_HUMAN	ZN765
sp|P62861|RS30_HUMAN	RS30
sp|O43913|ORC5_HUMAN	ORC5
sp|Q68CQ4|DIEXF_HUMAN	DIEXF
sp|P59998|ARPC4_HUMAN	ARPC4
sp|Q15554|TERF2_HUMAN	TERF2
sp|A6NEE1|PLHD1_HUMAN	PLHD1
sp|Q8NDQ6|ZN540_HUMAN	ZN540
sp|P63167|DYL1_HUMAN	DYL1
